# Supplementary material
Source: bioRxiv or medRxiv preprint supplement (https://medrxiv.org/content/medrxiv/early/2022/07/09/2022.07.07.22277366/DC4/embed/media-4.pdf)

*Acon Labs Flowflex*

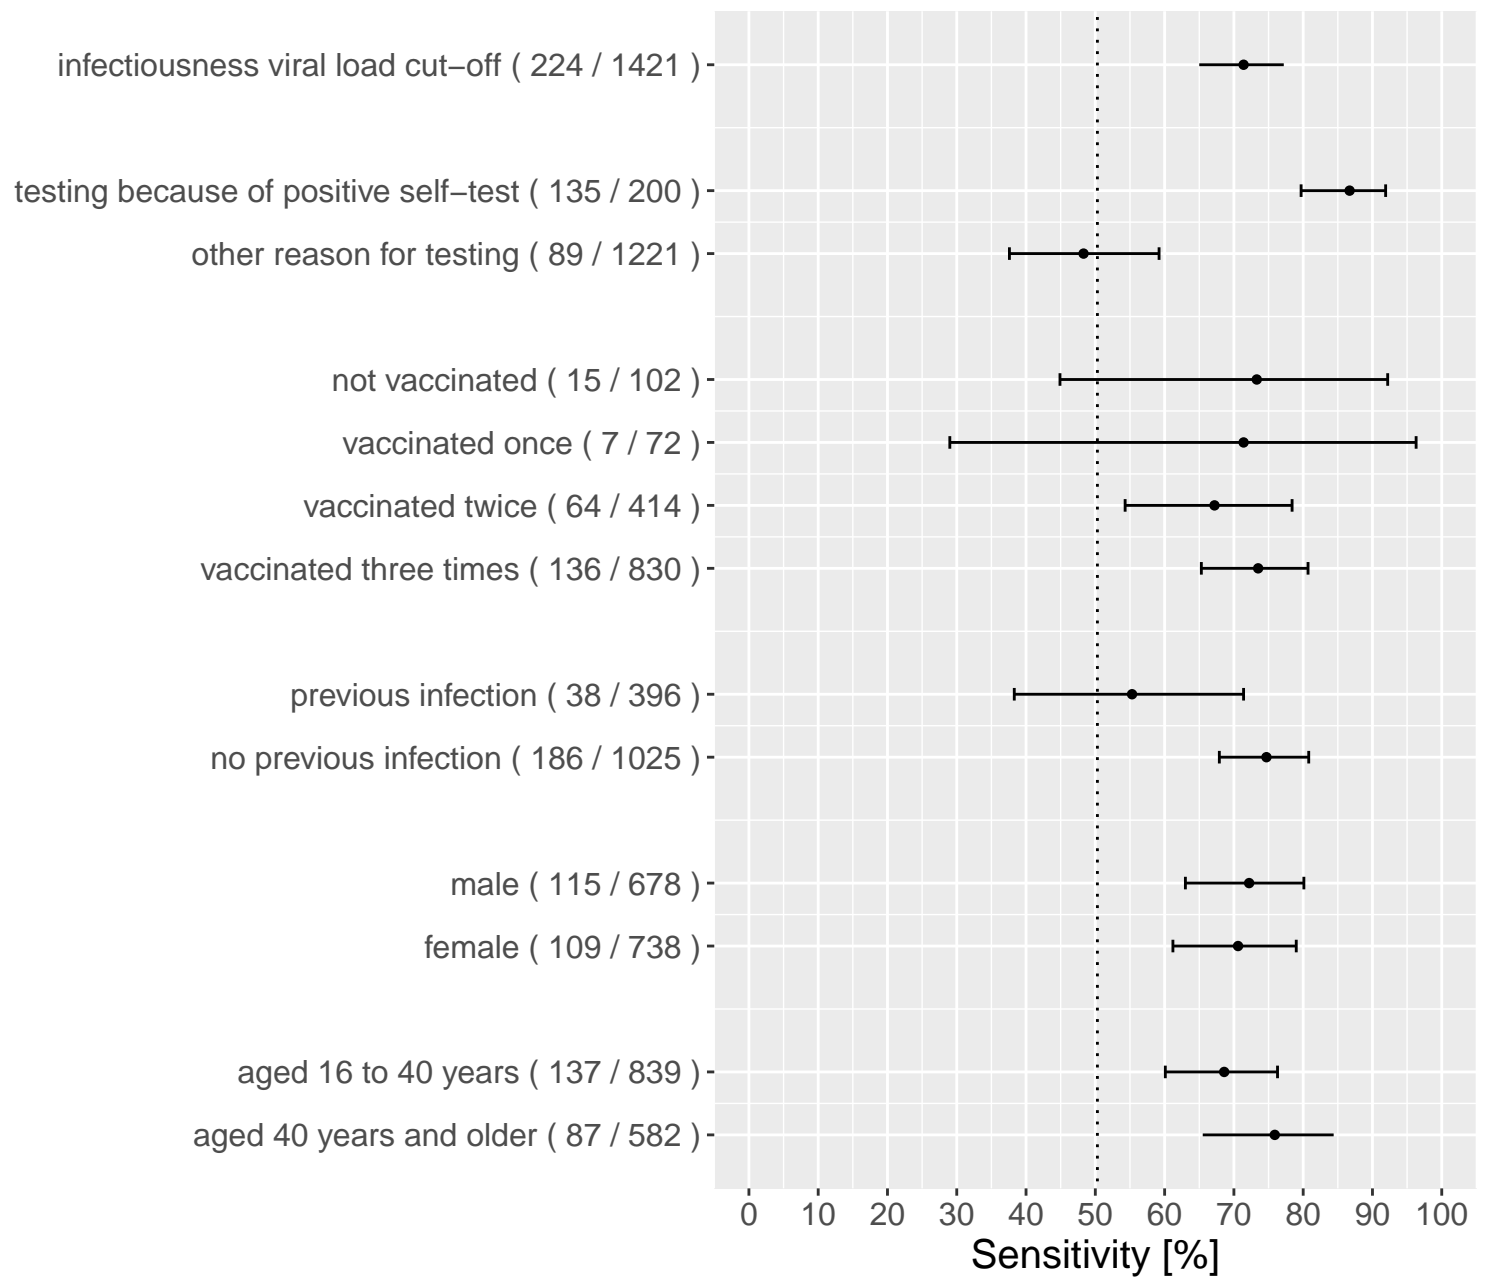

*MP Biomedicals*

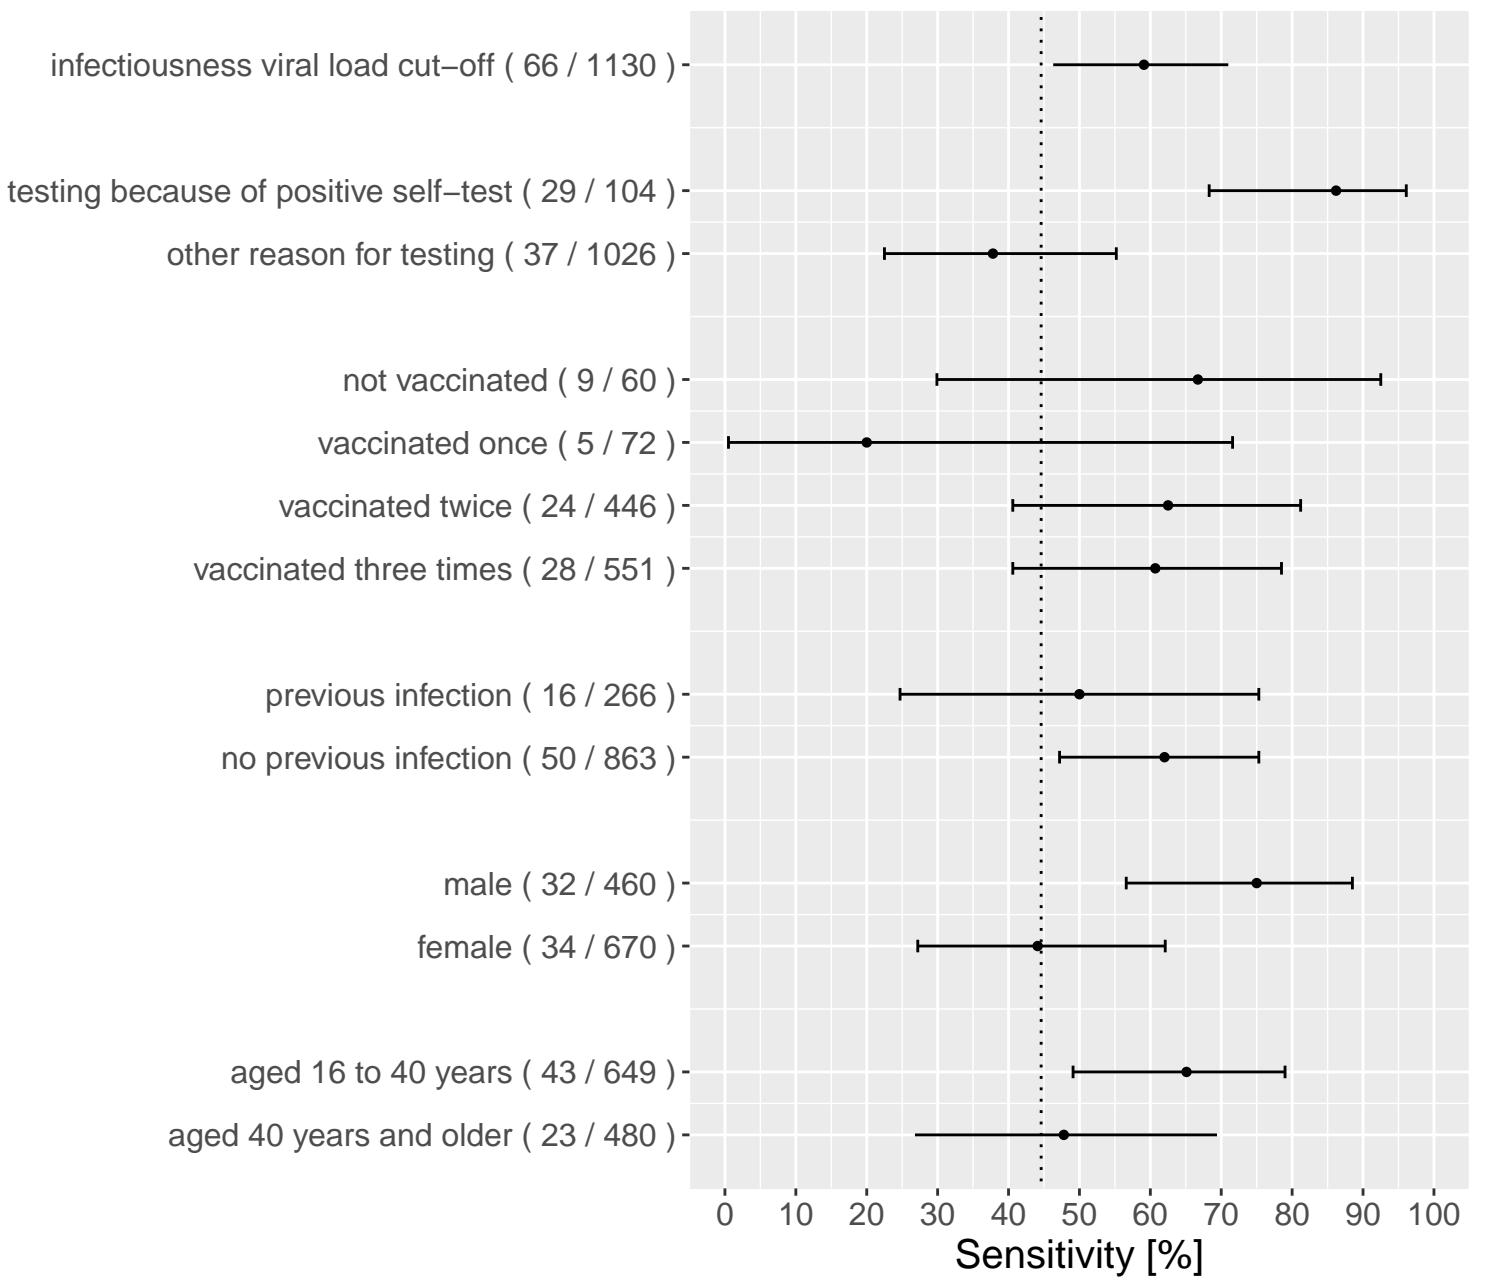

*Siemens Healthineers*

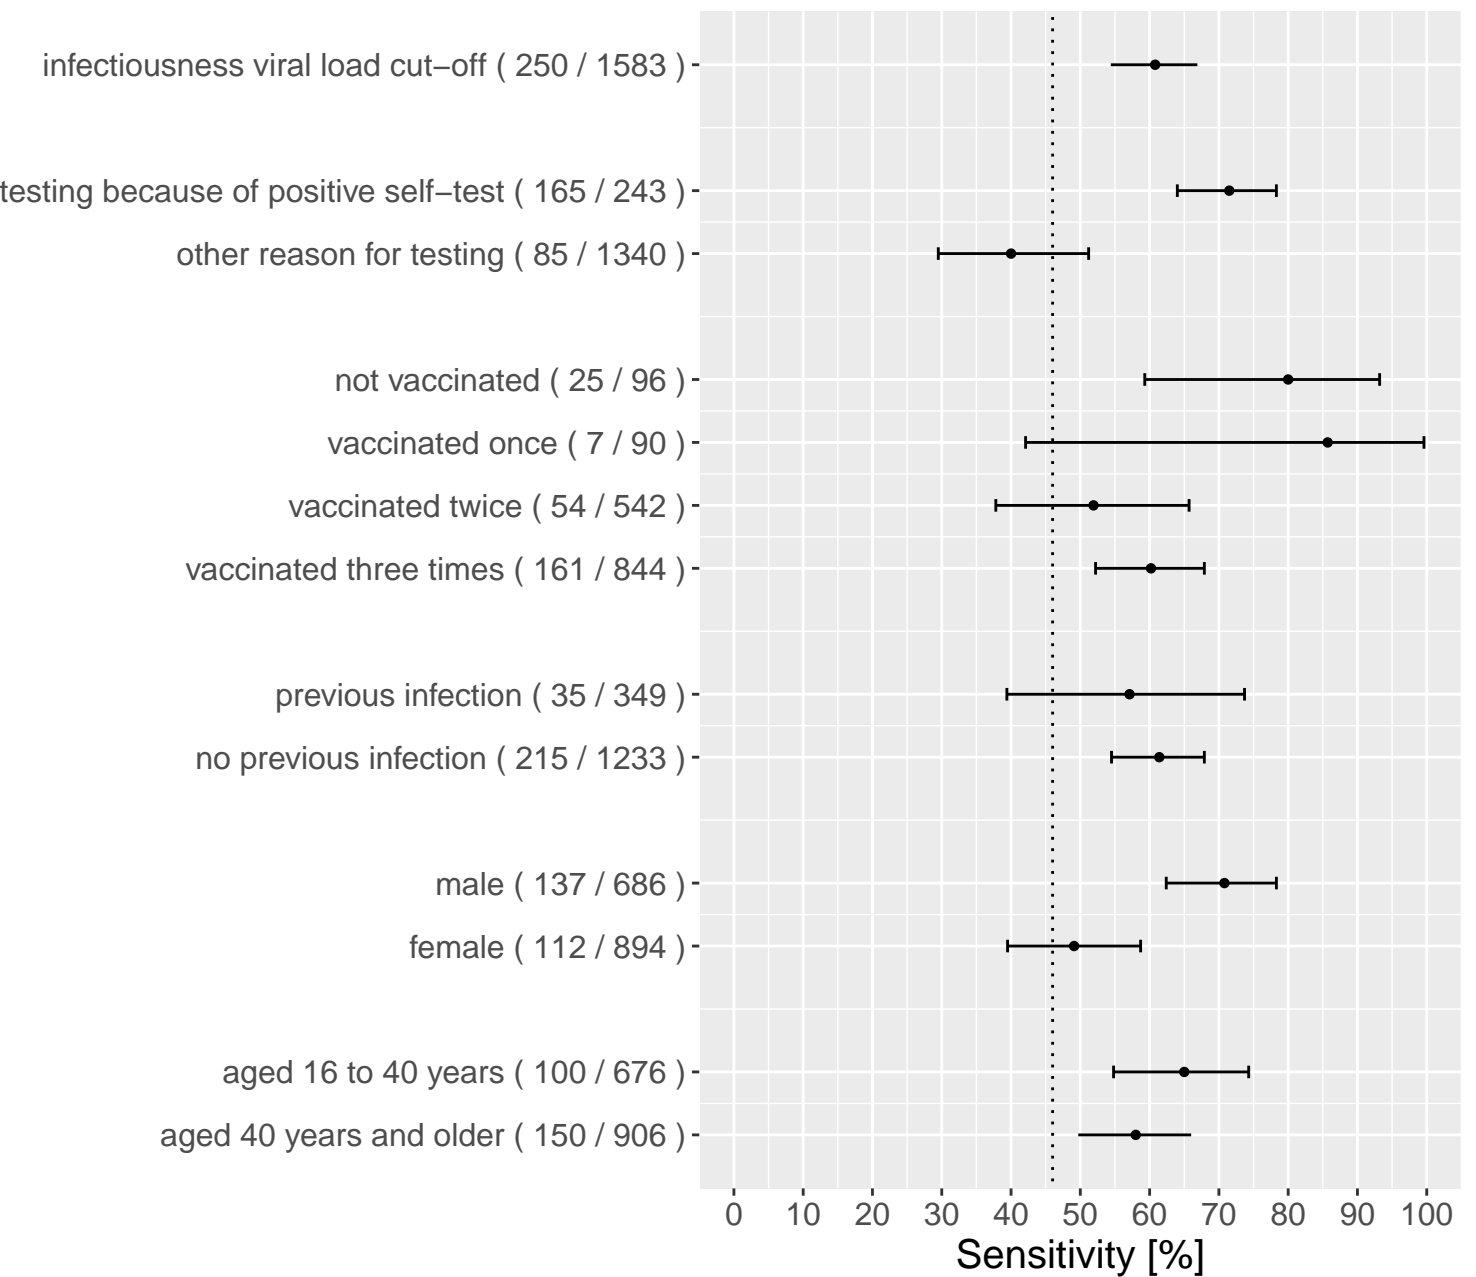

Supplement: Supplementary file [file media-4.pdf]
